# Supplementary material
Source: PubMed Central journal article supplement (PMC4312278)

**Supplementary figure 1.** (A) Analysis of the p14ARF gene transcription by semi-quantitative nested RT-PCR analysis in SNU1, AGS, STKM2, and HFE-145 cells (ethidium bromide staining is shown). Levels of p14ARF mRNA were quantitated by densitometry and normalized to HPRT1 mRNA expression. Expression of p14ARF mRNA in SNU1 cells was arbitrarily set at 1. Data are depicted as mean  $\pm$  SEM (n=3). (B) Pyrosequencing analysis of methylation of p14ARF promoter in the indicated gastric epithelial cell lines. Methylation of the ARF promoter in SNU1 was arbitrarily set at 1.

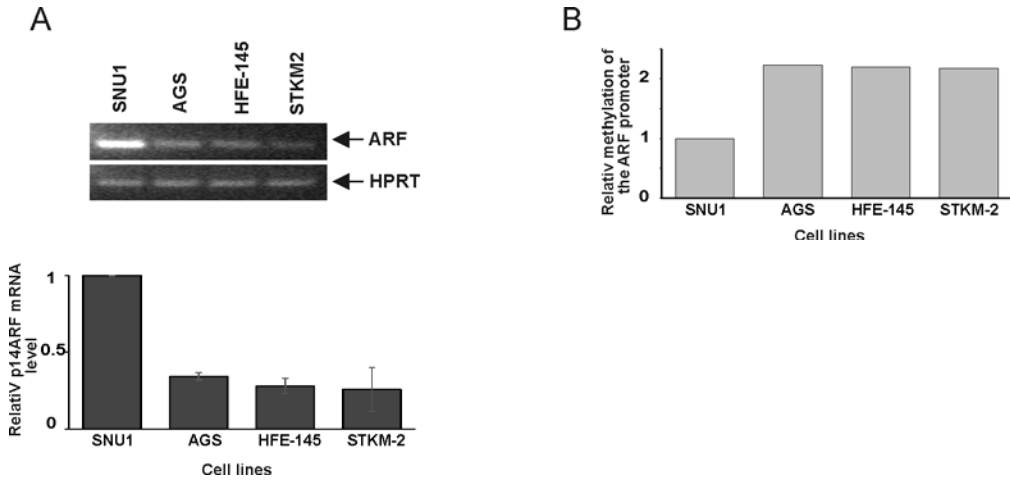

Supplement: NIHMS633678-supplement-supplementary_data.pdf [file NIHMS633678-supplement-supplementary_data.pdf]
